# Supplementary material for: Investigating the factors that influence sacrificial hydrogen evolution activity for three structurally-related molecular photocatalysts: thermodynamic driving force, excited-state dynamics, and surface interaction with cocatalysts
Source: Royal Society of Chemistry journal article supplement (doi:10.1039/d2cp04039e), 2023-01-01
Supplement: d2cp04039e1.pdf [file d2cp04039e1.pdf]

## Electronic supplementary information

### **Investigating the factors that influence sacrificial hydrogen evolution activity for three structurally-related molecular photocatalysts: thermodynamic driving force, excited-state dynamics, and surface interaction with cocatalysts**

Tao Liu,<sup>a</sup> Linjiang Chen,<sup>\*,b</sup> Xiaobo Li,<sup>c</sup> Andrew I. Cooper<sup>\*,a</sup>

<sup>a</sup> Materials Innovation Factory and Department of Chemistry, University of Liverpool, Liverpool, L7 3NY, UK.

<sup>b</sup> School of Chemistry and School of Computer Science, University of Birmingham, Birmingham, B15 2TT, UK.

<sup>c</sup> Key Laboratory of the Ministry of Education for Advanced Catalysis Materials, Zhejiang Key Laboratory for Reactive Chemistry on Solid Surfaces, Institute of Physical Chemistry, Zhejiang Normal University, Jinhua 321004, China

\* L.C.: l.j.chen@bham.ac.uk; A.I.C.: aicooper@liverpool.ac.uk

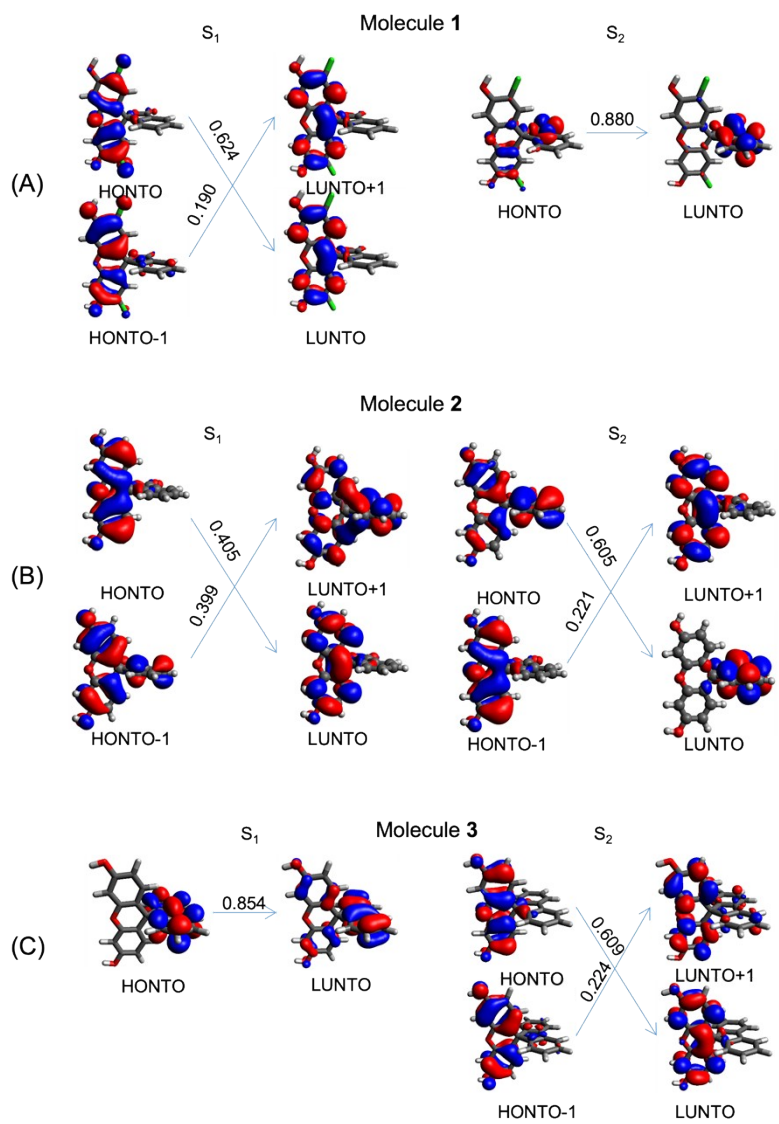

**Figure S1.** Natural transition orbitals (NTOs) for the dominant component transition of each of the first ( $S_1$ ) and second ( $S_2$ ) excited states for molecules **1** (A), **2** (B), and **3** (C), with the corresponding transition coefficients shown.

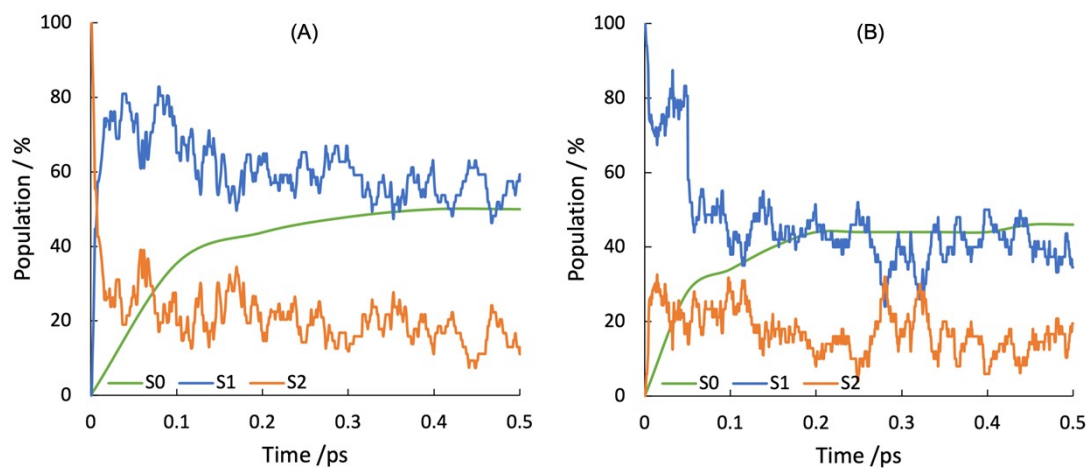

**Figure S2.** Dynamics of state-specific populations following photoexcitation for molecules **3**. Left: all initial states started on S2 (*i.e.*, Figure 3C of the main text). Right: all initial states started on S1, because of the much larger oscillator strength of S1 than that of S2.

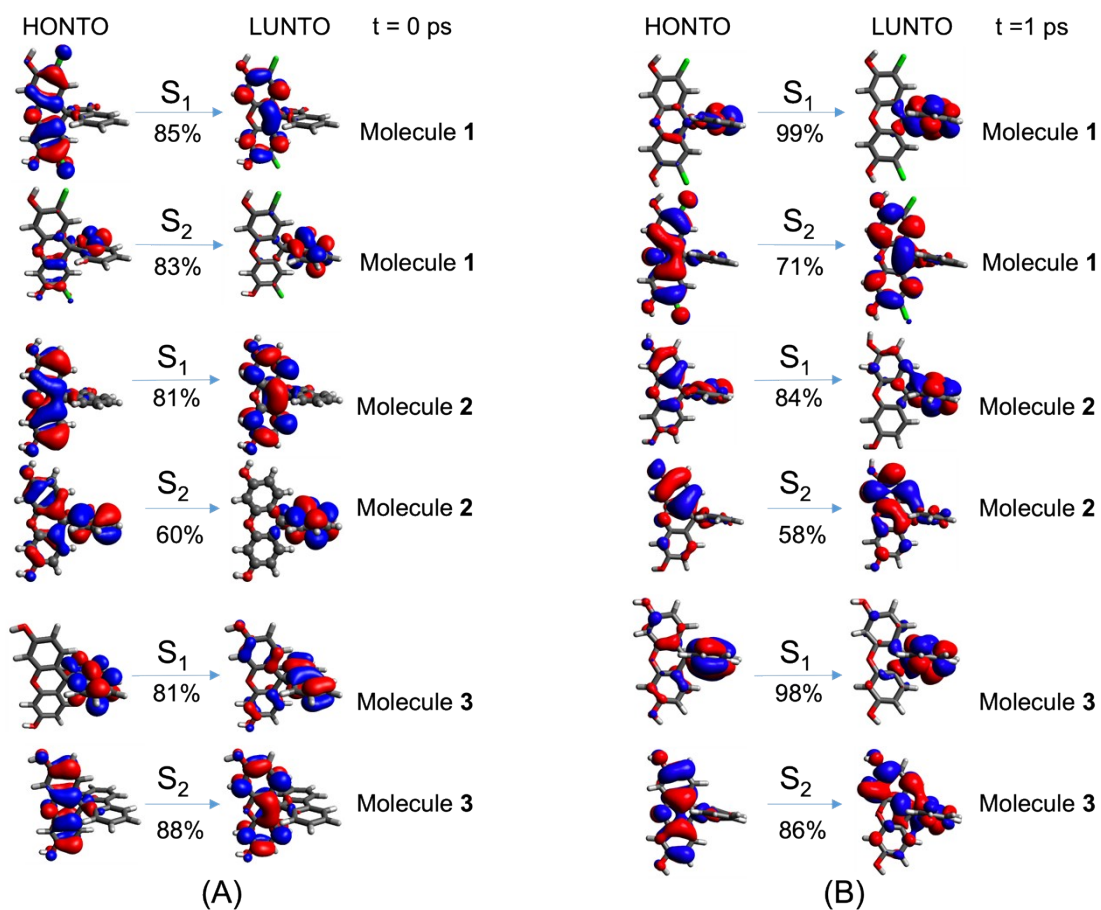

**Figure S3.** The frontier natural transition orbitals (NTOs; HO: highest occupied, LU: lowest unoccupied) of the first ( $S_1$ ) and second ( $S_2$ ) excited states of molecules 1 to 3 at  $t = 0$  ps (A) and  $t = 1$  ps (B); isosurface = 0.03 a.u.

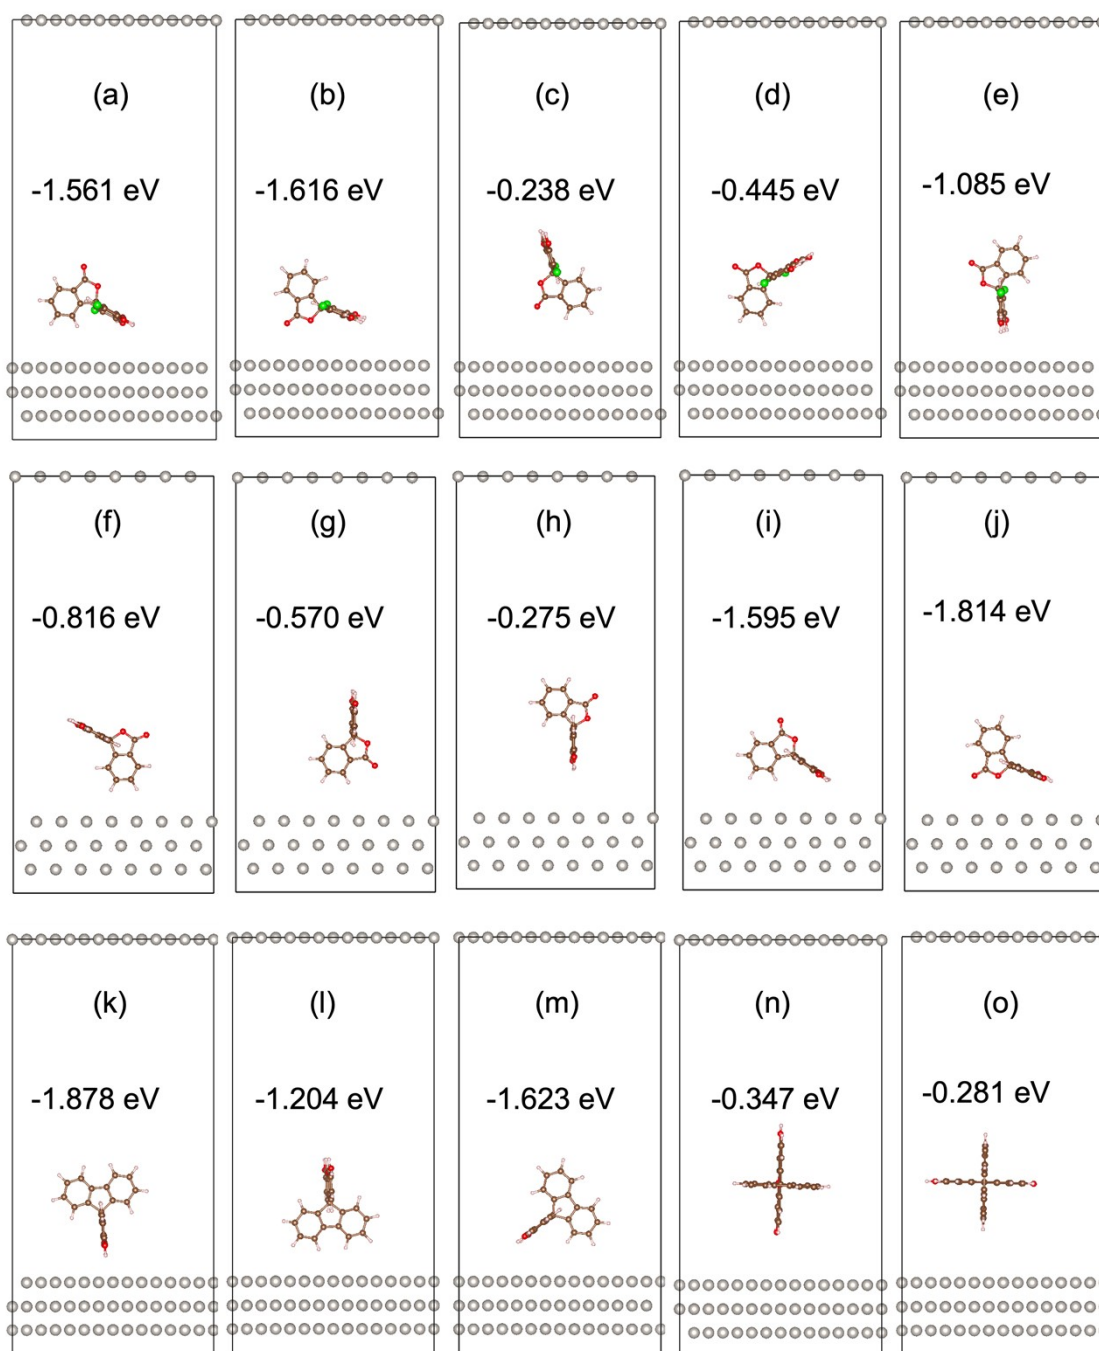

**Figure S4.** Different adsorption configurations of molecules **1** (a–e), **2** (f–j), and **3** (k–o) on the Pt(111) surface, together with binding energies.

## Computational details

All DFT and TD-DFT calculations made use of the CAM-B3LYP density functional, together with the 6-31G\* basis set. IP, EA, EA\* and IP\* are standard reduction potentials of half-reactions for free electrons/holes and excitons and were calculated adiabatically with molecular geometries fully optimized for the respective states. The effect of solvation by water was accounted for using the PCM/SMD solvation model.

$S_r$  and  $E_C$  are descriptors from quantitative characterization of hole and electron distributions in real space, performed for the optimized  $S_1$  state, using the Multiwfn software.  $S_r$  index quantifies the overlap between the hole distribution ( $\rho^{\text{hole}}(\mathbf{r})$ ) and the electron distribution ( $\rho^{\text{electron}}(\mathbf{r})$ ).  $S_r$  varies between 0 (no overlap) and 1 (complete overlap); the larger the value is, the greater the extent of overlap is.  $E_C$  is the Coulomb attraction energy between the electron and hole, given by

$$E_C = \iint \frac{\rho^{\text{hole}}(r_1)\rho^{\text{electron}}(r_2)}{|r_1 - r_2|} dr_1 dr_2$$

**Table S1.** Calculated values of  $S_r$  and  $E_C$  for molecules **1**, **2**, and **3**.

|                   | $S_r$ / a.u. | $E_C$ / eV |
|-------------------|--------------|------------|
| Molecule <b>1</b> | 0.855        | 5.069      |
| Molecule <b>2</b> | 0.739        | 3.404      |
| Molecule <b>3</b> | 0.788        | 5.492      |

TD-DFT S1 and S2 results:

Molecule 1

Excited State 1: Singlet-A 4.9175 eV 252.13 nm f=0.0273 <S\*\*2>=0.000

Excited State 2: Singlet-A 5.0955 eV 243.32 nm f=0.4042 <S\*\*2>=0.000

Molecule 2

Excited State 1: Singlet-A 5.0291 eV 246.53 nm f=0.0096 <S\*\*2>=0.000

Excited State 2: Singlet-A 5.0770 eV 244.21 nm f=0.1557 <S\*\*2>=0.000

Molecule 3

Excited State 1: Singlet-A 4.6608 eV 266.01 nm f=0.6695 <S\*\*2>=0.000

Excited State 2: Singlet-A 4.9917 eV 248.38 nm f=0.0036 <S\*\*2>=0.000

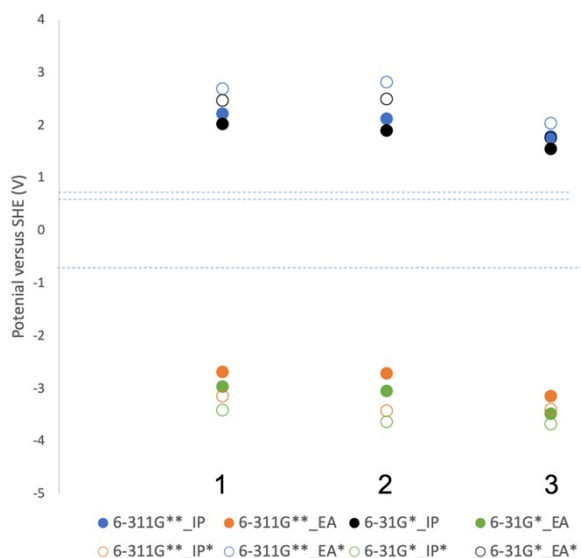

**Figure S5.** Comparison of basis sets for calculated IP, EA, IP\*, and EA\*.

**Table S2.** Comparison of basis sets for calculated values of  $S_r$  and  $E_C$ .

|                   | 6-31G*       |            | 6-311G**     |            |
|-------------------|--------------|------------|--------------|------------|
|                   | $S_r$ / a.u. | $E_C$ / eV | $S_r$ / a.u. | $E_C$ / eV |
| Molecule <b>1</b> | 0.855        | 5.069      | 0.772        | 4.252      |
| Molecule <b>2</b> | 0.739        | 3.404      | 0.808        | 4.038      |
| Molecule <b>3</b> | 0.788        | 5.492      | 0.704        | 4.400      |

Periodic DFT calculations of adsorption configurations for molecules **1**, **2**, and **3** on the Pt(111) surface were carried out within the plane-wave pseudopotential formalism, using the Vienna *ab initio* Simulation Package (VASP) code. A kinetic-energy cutoff of 400 eV was used to define the plane-wave basis set, and the electronic Brillouin zone was sampled by  $\Gamma$ -centred Monkhorst–Pack grids using  $1 \times 1 \times 1$   $k$ -point for all the calculations. Geometry optimizations on atomic positions were performed employing the Perdew–Burke–Ernzerhof (PBE) exchange–correlation functional with the DFT-D3(BJ) dispersion correction. Tolerances of  $10^{-6}$  eV and  $0.02$  eV  $\text{\AA}^{-1}$  were applied during the optimization of the Kohn–Sham wavefunctions and the geometry optimizations, respectively.

The binding energy of a single molecule **1/2/3** on the Pt(111) surface was calculated by

$$E_{\text{binding}} = E[\text{molecule@Pt(111)}] - E[\text{molecule}] - E[\text{Pt(111)}]$$

where  $E[\text{molecule@Pt(111)}]$ ,  $E[\text{molecule}]$ , and  $E[\text{Pt(111)}]$  are the total energies of the adsorption complex, isolated molecule, and empty Pt(111) surface, respectively.  $E[\text{molecule}]$  was calculated by placing a single molecule **1**, **2** or **3** in a  $19.22 \text{ \AA} \times 19.42 \text{ \AA} \times 40 \text{ \AA}$  box. Four layers of Pt was  $6.9 \text{ \AA}$  in thickness and placed on the  $ab$  plane of the simulation cell. The Pt(111) surface had an in-plane dimension of  $a = 19.22 \text{ \AA}$ ,  $b = 19.42 \text{ \AA}$  and was isolated on both sides by a vacuum layer of  $33.1 \text{ \AA}$  along the  $c$  direction.



## Experimental details

**Materials.** Molecules **1** to **3** were purchased from commercial suppliers and used without further purification. Water for the hydrogen evolution experiments was purified using an ELGA LabWater system with a Purelab Option S filtration and ion exchange column ( $\rho = 15 \text{ M}\Omega \text{ cm}$ ) without pH level adjustment.

**Photocatalytic hydrogen evolution experiments.** Agilent Technologies vials (10 mL) were charged with  $5.0 \pm 0.1$  mg of small molecules and transferred to a Chemspeed Accelerator SWING robot for liquid transfer. Degassed jars with triethylamine, methanol, and a stock solution of  $\text{H}_2\text{PtCl}_6$  were loaded into the automated liquid handling platform. The system was then closed and purged for 4 h with nitrogen. The automated liquid handling platform then dispensed the liquids as specified, which were degassed aqueous  $\text{H}_2\text{PtCl}_6$  solution (1.7 mL, 3wt % Pt to small molecules), triethylamine (1.7 mL), and methanol (1.7 mL). The pH of the solution was around 11.5. The vials were then capped using the capper/crimper tool under inert conditions. Once capped, the samples were taken out, shaken briefly, and transferred to an ultrasonic bath to disperse the photocatalysts. An Oriel Solar Simulator 94123A with an output of 1.0 sun was then used to illuminate the vials on a Stuart roller bar SRT9 for the time specified (classification IEC 60904-9 2007 spectral match A, uniformity classification A, temporal stability A, 1600 W xenon light source,  $12 \times 12$  in.2 output beam, air mass 1.5 G filter, 350–1000 nm). After photocatalysis, the gaseous products of the samples were measured on an Agilent gas connected to a headspace sampler (HS) and Shimadzu GC-HS. No hydrogen evolution was observed for mixtures of water/triethylamine/methanol or water/triethylamine/methanol/ $\text{H}_2\text{PtCl}_6$  under the identical conditions.

## UV-Vis spectra of molecules **1** to **3**

There is significant difference in light absorption for the three molecules, as shown in Figure S6. As the spectrum of AM 1.5 lamp (used in HT screen) is from 350 to 1000 nm, molecule **3** sits on the edge of this spectrum. Hence, the photocatalytic hydrogen production of molecule **3** was also carried out by using Xenon lamp with a cut-off filter 295 nm ( $> 295$  nm, light wavelength); after 3 hours, only 1 micromole of

hydrogen was observed. This indicates that the low activity of molecule **3** is not solely due to its poor light-harvesting ability in comparison to molecule **1** and **2**.

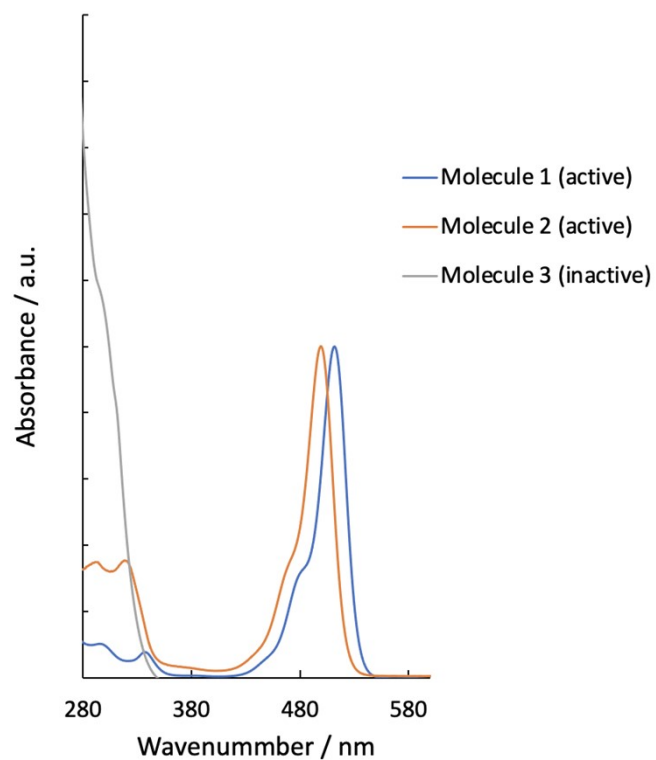

**Figure S6.** Experimental light absorption of molecules **1** (blue), **2** (orange), and **3** (grey).
